# Supplementary material
Source: Springer Nature journal article supplement (https://www.springermedizin.de/resource/supplementary/12984_2012_504_MOESM3_ESM.pdf/9604740)

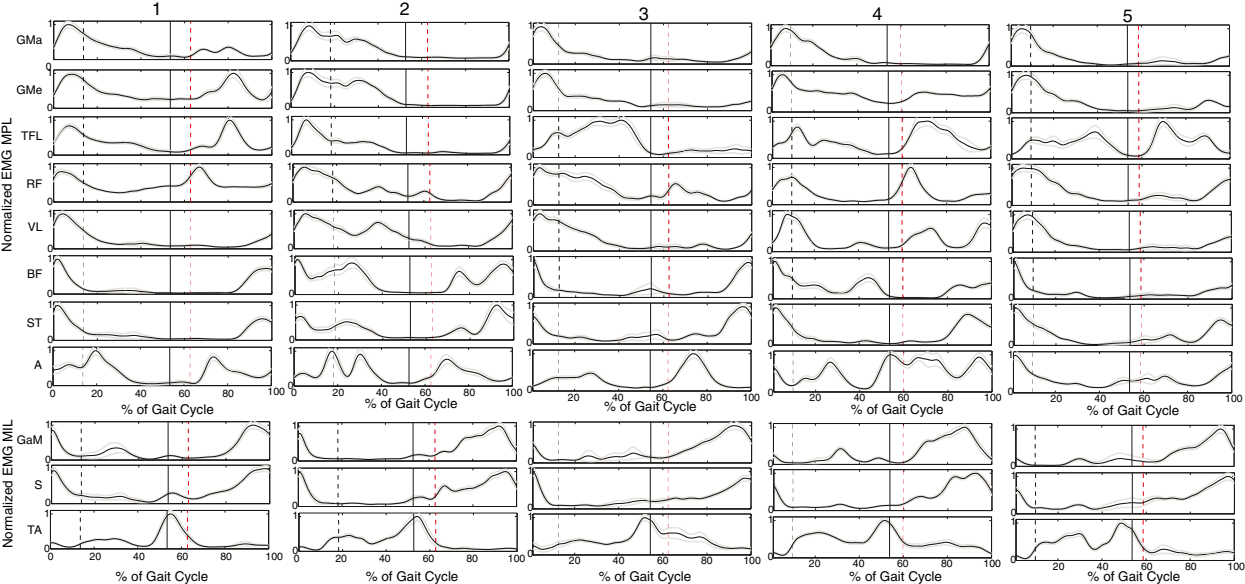

Supplement: MOESM3 [file 9604740]
